# Supplementary material for: Impact of in-hospital discontinuation with angiotensin receptor blockers or converting enzyme inhibitors on mortality of COVID-19 patients: a retrospective cohort study
Source: Springer Nature journal article supplement (doi:10.1186/s12916-021-01992-9), 2021-05-12
Supplement: MOESM2 [file 19158142]

# IMPACT OF IN-HOSPITAL DISCONTINUATION OF ANGIOTENSIN RECEPTOR BLOCKERS OR ANGIOTENSIN CONVERTING ENZYME INHIBITORS ON MORTALITY OF COVID-19 PATIENTS: A RETROSPECTIVE COHORT STUDY

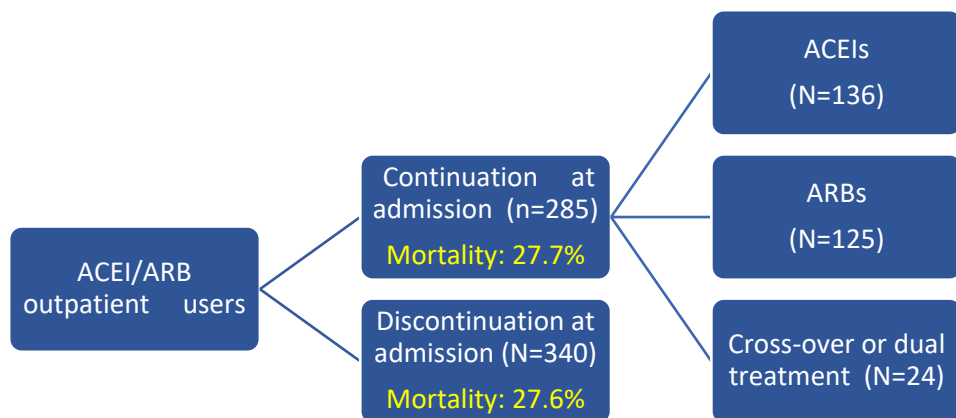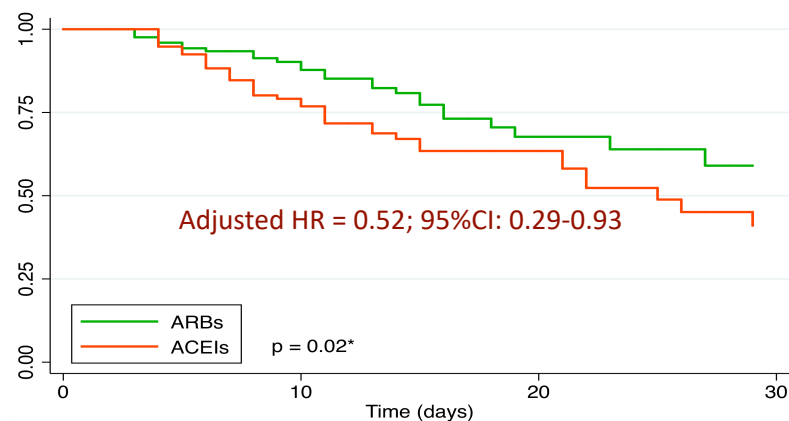

| Number at risk: | 0   | 10 | 20 | 30 |
|-----------------|-----|----|----|----|
| ACEIs           | 136 | 70 | 26 | 9  |
| ARBs            | 125 | 75 | 21 | 9  |

\* Logrank test

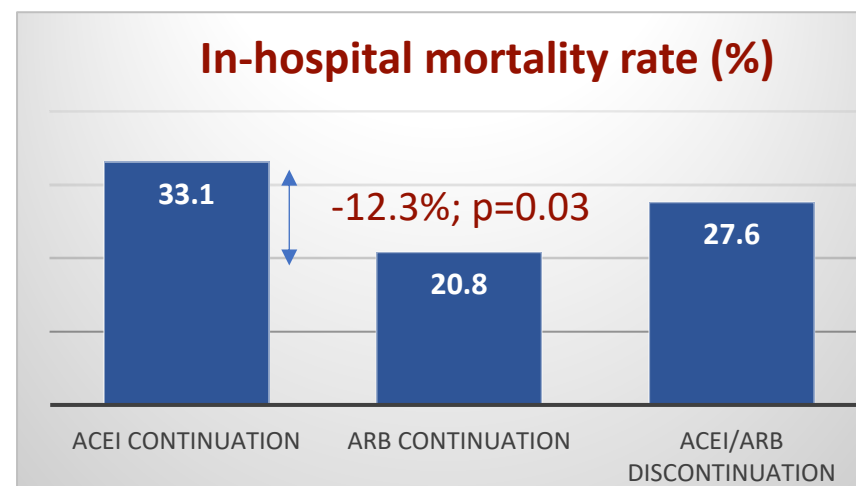

|                           | ARBs continued Deaths (%) | ACEIs continued Deaths (%) |  | MC-HR (95%CI)*   | Test of interaction p-value |
|---------------------------|---------------------------|----------------------------|--|------------------|-----------------------------|
| <b>RISK FACTORS:</b>      |                           |                            |  |                  |                             |
| <b>GENDER</b>             |                           |                            |  |                  |                             |
| Females                   | 8 (14.0)                  | 16 (29.1)                  |  | 0.58 (0.27-1.26) | 0.40                        |
| Males                     | 18 (26.5)                 | 29 (35.8)                  |  | 0.34 (0.13-0.93) |                             |
| <b>AGE (years)</b>        |                           |                            |  |                  |                             |
| < 75                      | 5 (7.9)                   | 12 (18.2)                  |  | 0.42 (0.11-1.66) | 0.91                        |
| 75+                       | 21 (33.9)                 | 33 (47.1)                  |  | 0.46 (0.25-0.85) |                             |
| <b>OBESITY</b>            |                           |                            |  |                  |                             |
| No                        | 19 (22.9)                 | 33 (33.3)                  |  | 0.56 (0.28-1.10) | 0.26                        |
| Yes                       | 7 (16.7)                  | 12 (32.4)                  |  | 0.22 (0.05-0.94) |                             |
| <b>DIABETES</b>           |                           |                            |  |                  |                             |
| No                        | 13 (18.8)                 | 31 (33.0)                  |  | 0.56 (0.26-1.20) | 0.49                        |
| Yes                       | 13 (23.2)                 | 14 (33.3)                  |  | 0.36 (0.13-0.97) |                             |
| <b>HEART FAILURE</b>      |                           |                            |  |                  |                             |
| No                        | 19 (17.8)                 | 33 (28.5)                  |  | 0.63 (0.31-1.26) | 0.04                        |
| Yes                       | 7 (38.9)                  | 12 (60.0)                  |  | 0.12 (0.03-0.48) |                             |
| <b>BACKGROUND CV RISK</b> |                           |                            |  |                  |                             |
| CV risks factors          | 12 (15.6)                 | 23 (29.1)                  |  | 0.59 (0.25-1.39) | 0.61                        |
| CV diseases               | 14 (29.2)                 | 22 (38.6)                  |  | 0.43 (0.18-1.03) |                             |
| <b>SEVERITY SCORE</b>     |                           |                            |  |                  |                             |
| 0 - 3                     | 15 (17.2)                 | 25 (27.5)                  |  | 0.59 (0.27-1.27) | 0.73                        |
| 4 - 7                     | 11 (29.0)                 | 20 (44.4)                  |  | 0.48 (0.20-1.14) |                             |

**CONCLUSIONS:** The discontinuation of ACEIs/ARBs at admission did not improve the in-hospital survival. On the contrary, the continuation of ARBs was associated with a trend to a reduced mortality as compared to their discontinuation and with a significantly lower mortality risk as compared to the continuation of ACEIs, especially in high-risk patients.
